# Supplementary material for: Comparative effectiveness study of breast-conserving surgery and mastectomy in the general population: A NCDB analysis
Source: PubMed Central journal article supplement (PMC4741884; doi:10.18632/oncotarget.5394), 2015-10-19
Supplement: oncotarget-06-40127-s001.pdf [file oncotarget-06-40127-s001.pdf]

**Supplementary Table S1: Univariate analysis of factors associated with overall survival**

**Supplementary Table S2A: Details of estimates of cox-regression model in the entire population stratified by N-stage**

**Supplementary Table S2B: Details of estimates of cox-regression model in the population with no/few comorbidities and stratified by N-stage**

**Supplementary Table S2C: Details of estimates of cox-regression model in the population stratified by N-stage and age. (age>50)**

**Supplementary Table S2D: Details of estimates of cox-regression model in the population stratified by N-stage and age(age>50)**
